# Supplementary material for: Enzyme-Treated Soybean Meal Enhanced Performance via Improving Immune Response, Intestinal Morphology and Barrier Function of Nursery Pigs in Antibiotic Free Diets
Source: MDPI journal article supplement (doi:10.3390/ani11092600), 2021-09-04
Supplement: s1 [file s1]

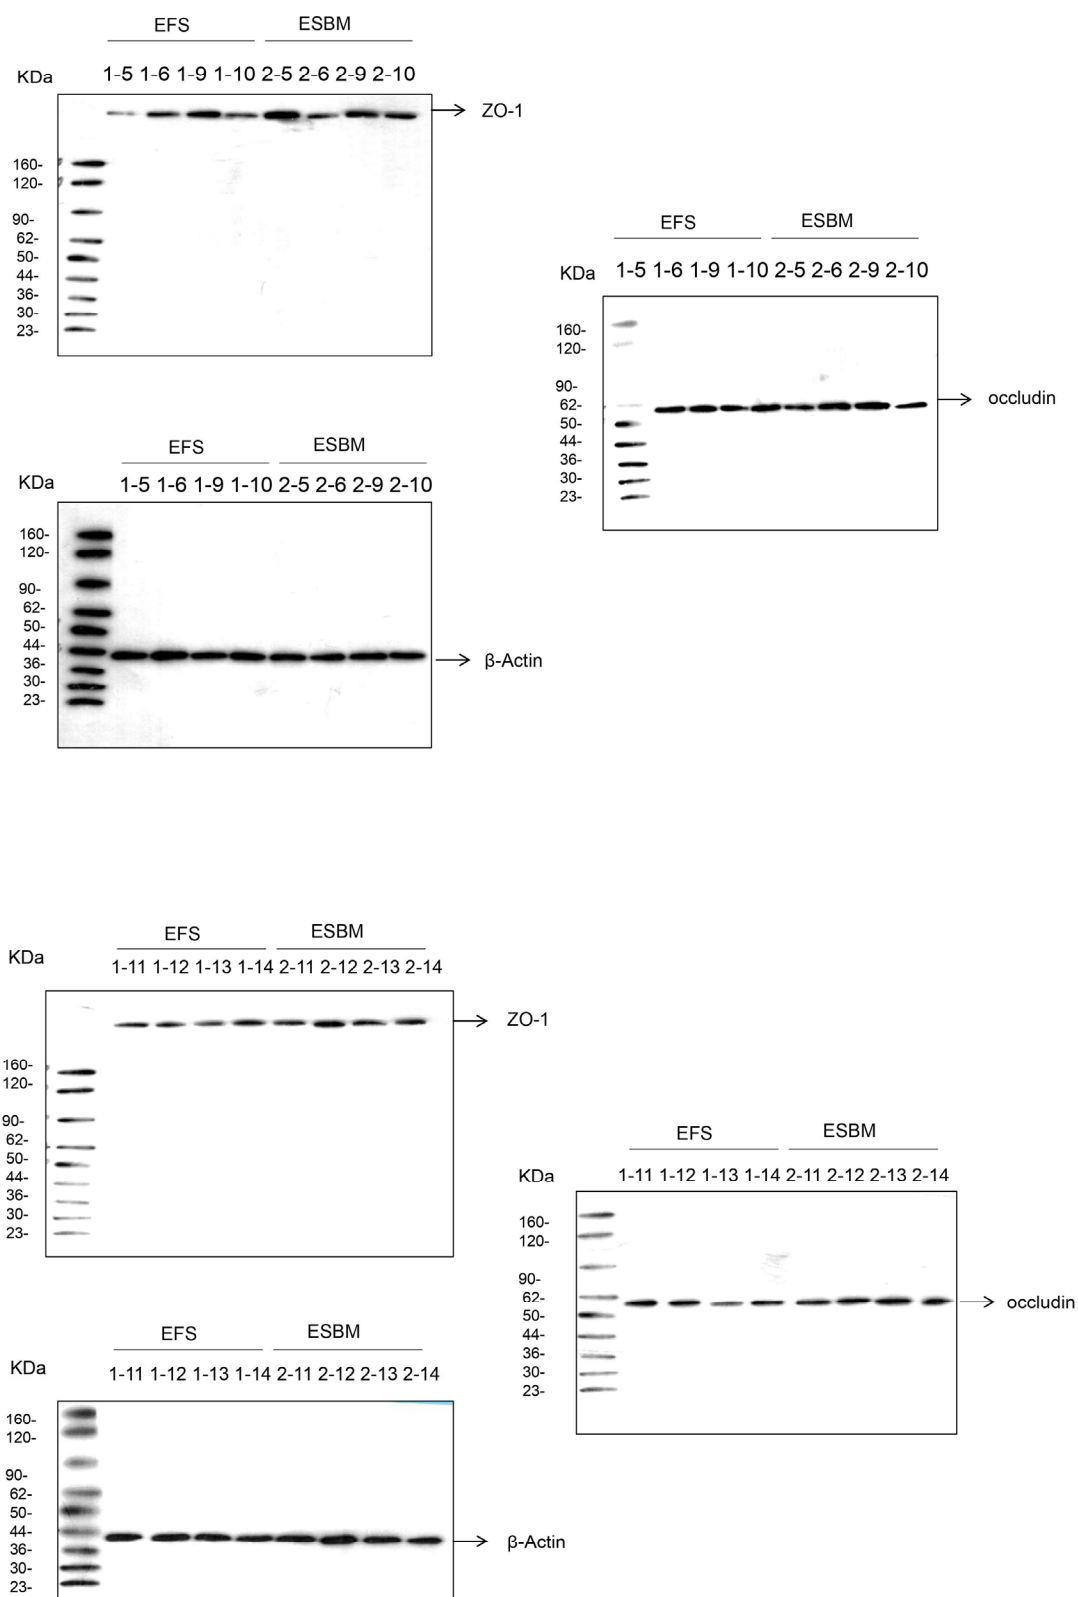

**Figure S1.** Effects of enzyme-treated soybean meal replacing extruded full-fat soybean on protein expression of ZO-1 and occludin. EFS: Extruded full-fat soybean; ESBM: Enzyme-treated SBM.
